# Supplementary material for: Synthesis of biodegradable and biorenewable polylactides initiated by aluminum complexes bearing m-xylylenediamine derivatives via the ring-opening polymerization of lactides
Source: Royal Society of Chemistry journal article supplement (doi:10.1039/c9nj01268k), 2019-01-01
Supplement: c9nj01268k1.pdf [file c9nj01268k1.pdf]

***Electronic Supplementary Information***

**Syntheses of Biodegradable and Biorenewable Polylactides  
Initiated by Aluminum Complexes Bearing m-  
Xylylenediamine Derivatives *via* the Ring-Opening  
Polymerization of Lactides**

**Dongni Li,<sup>a, b</sup> Bo Gao,<sup>\*a, c, d</sup> and Qian Duan<sup>\*a, c</sup>**

a School of Materials Science and Engineering, Changchun University of Science and Technology, 7989 Weixing Road, Changchun 130022, China. Tel: +86-431-85583015, Fax: +86-431-85583015.

b Department Of Blood Transfusion, China–Japan Union Hospital of Jilin University, Jilin University, 126 Xiantai Street, Changchun, 130033, China.

c Engineering Research Center of Optoelectronic Functional Materials, Ministry of Education, Changchun 130022, China

d Key Laboratory of Polymer Ecomaterials, Changchun Institute of Applied Chemistry, Chinese Academy of Sciences, Changchun 130022, China

\*correspondence author, E-mail: gaobo@ciac.ac.cn; qianduan88@hotmail.com.

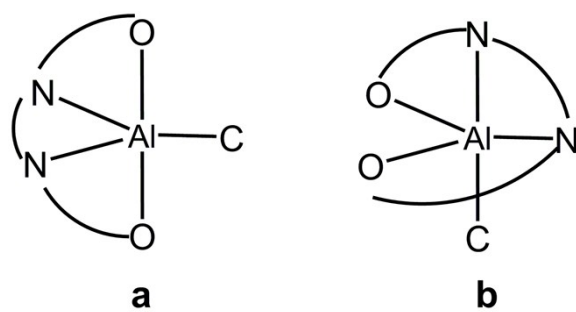

**Figure S1.** Possible trigonal bipyramidal coordination isomers.

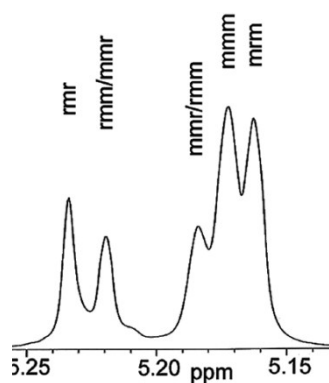

**Figure S2.** Homonuclear decoupled  $^1\text{H}$  NMR spectrum of the methine part of poly(*rac*-LA) by complex **4** at 25 °C, Table 1, entry 11, 500 MHz,  $\text{CDCl}_3$ )

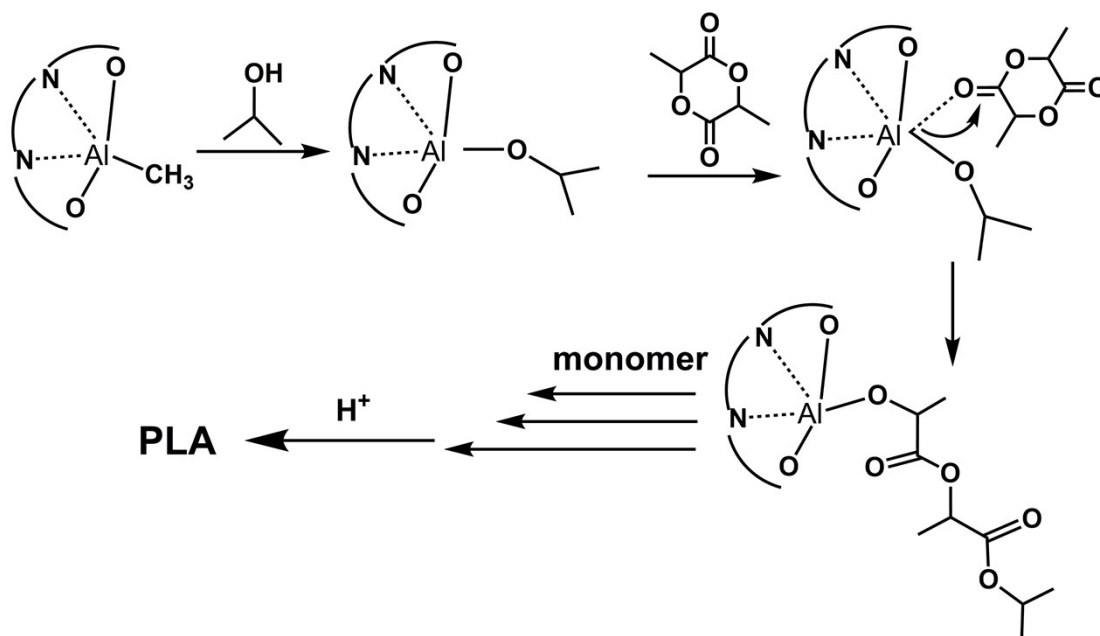

**Figure S3.** Proposed mechanism for the ROP of lactide initiated by aluminum complexes with isopropanol.

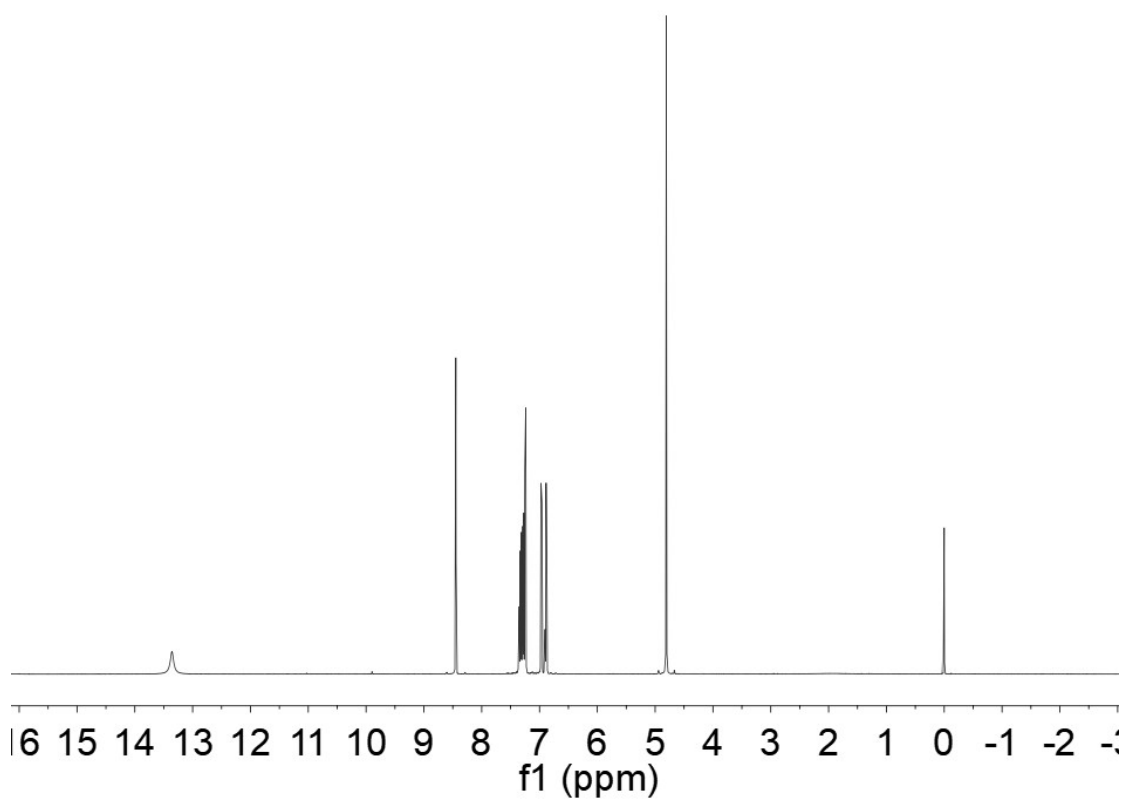

Figure S4.  $^1\text{H}$  NMR spectrum of pro-ligand **a**,  $\text{CDCl}_3$ , at  $25\text{ }^\circ\text{C}$ .

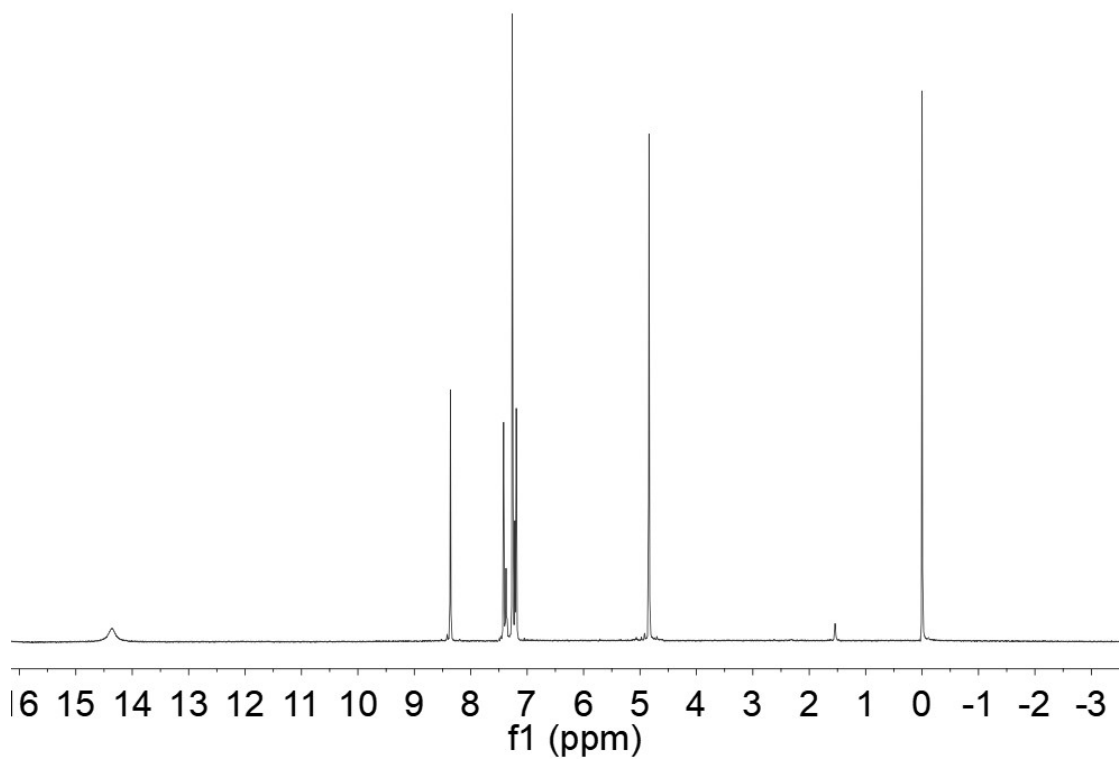

Figure S5.  $^1\text{H}$  NMR spectrum of pro-ligand **c**,  $\text{CDCl}_3$ , at  $25\text{ }^\circ\text{C}$ .

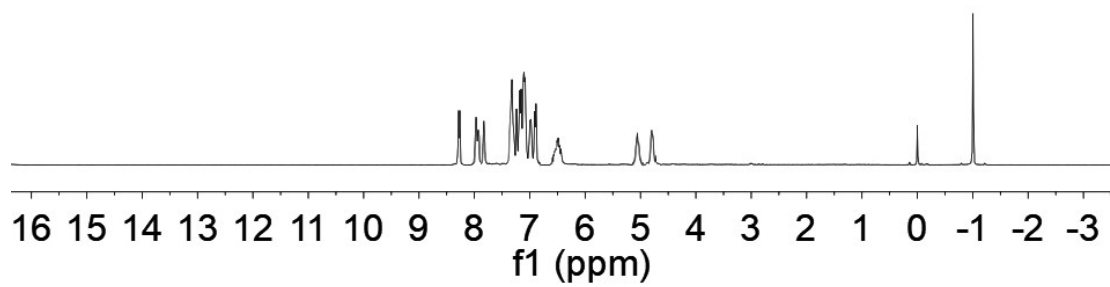

Figure S6.  $^1\text{H}$  NMR spectrum of complex **1**,  $\text{CDCl}_3$ , at  $25^\circ\text{C}$ .

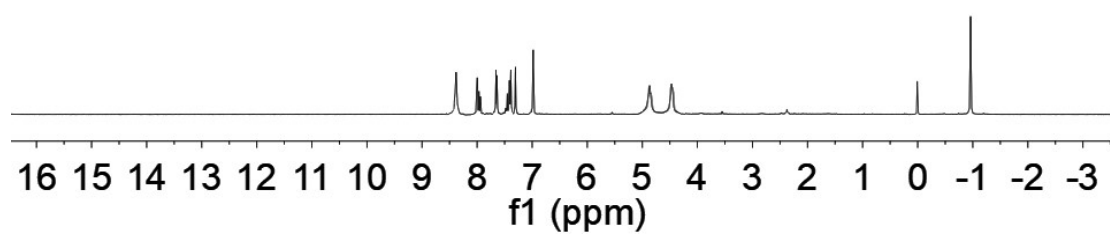

Figure S7.  $^1\text{H}$  NMR spectrum of complex **3**,  $\text{CDCl}_3$ , at  $25^\circ\text{C}$ .
